# Supplementary material for: The effects of a low-carbohydrate, ketogenic diet on the polycystic ovary syndrome: A pilot study
Source: Springer Nature journal article supplement (doi:10.1186/1743-7075-2-35), 2005-12-01

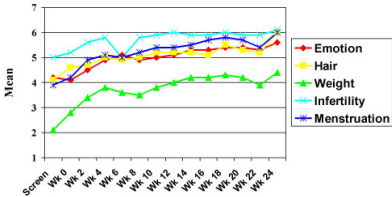

Supplement: 12986_2005_51_MOESM1_ESM.pdf [file 12986_2005_51_MOESM1_ESM.pdf]
